# Supplementary material
Source: PubMed Central journal article supplement (PMC5870125)
Supplement: NIHMS950769-supplement-Supplemental.pdf [file NIHMS950769-supplement-Supplemental.pdf]

## SUPPLEMENTAL

### FIGURE S1

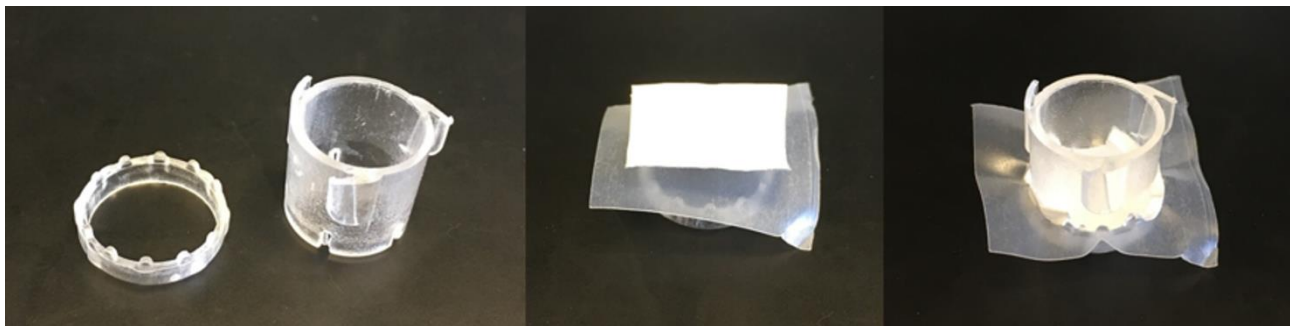

**Figure S1.** CellCrown inserts were used to secure PNIPAAm/PCL fibers. Squares of PNIPAAm/PCL fibers and parafilm were layered onto the CellCrown bottom (middle). A fully assembled CellCrown with PNIPAAm/PCL fibers (right).

**TABLE S1**

| PNIPAAm content | Total Polymer (wt/vol) | Solvent                 | Charge (kV) |
|-----------------|------------------------|-------------------------|-------------|
| 0%              | 10%                    | HFP                     | 4.5-6.5     |
| 25%             | 12%                    | 1:3 methanol:chloroform | 7.0-10.5    |
| 50%             | 12%                    | 1:3 methanol:chloroform | 8.5-9.5     |
| 75%             | 15%                    | 1:3 methanol:chloroform | 9.0-10.0    |
| 90%             | 18%                    | 1:3 methanol:chloroform | 13.0-15.0   |
| 100%            | 20%                    | methanol                | 11.0-11.5   |

**Table S1.** Solution and electrospinning parameters for PNIPAAm/PCL fibers.

**FIGURE S2**

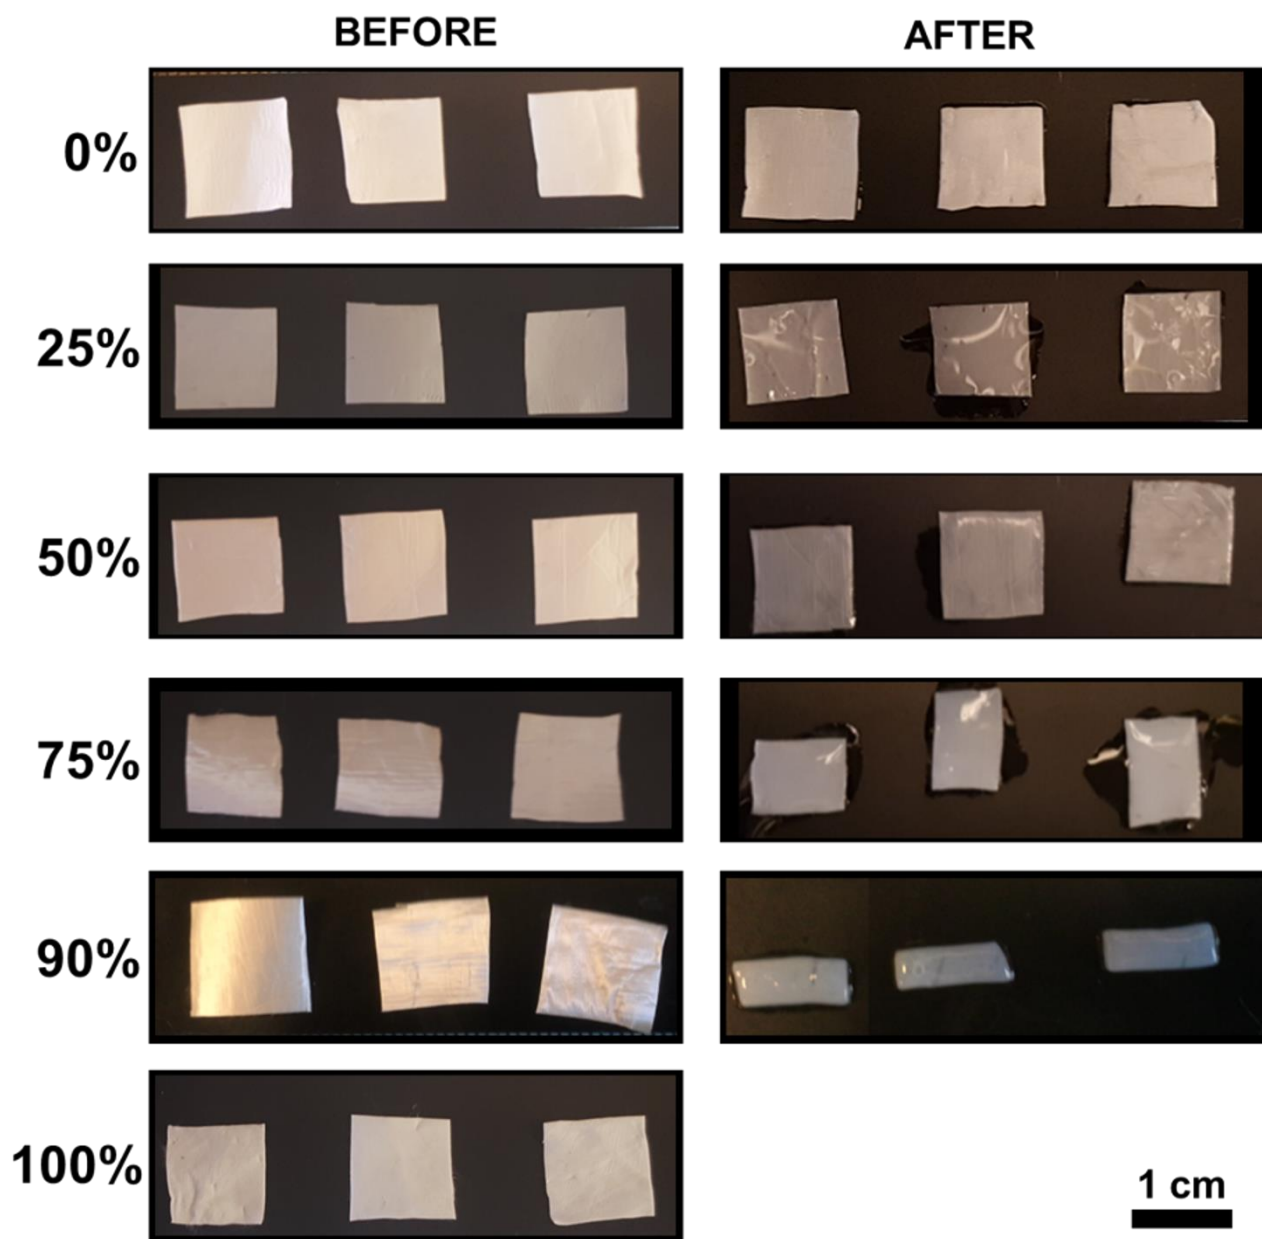

**Figure S2.** PNIPAAm/PCL fibers before and after PNIPAAm dissolution.

**FIGURE S3**

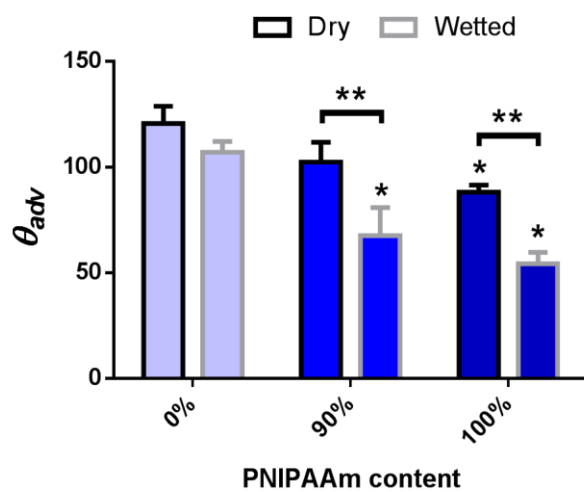

**Figure S3.** Advancing water contact angle of dry and wetted PNIPAAm/PCL fibers. \* $p < 0.05$  compared to corresponding 0% PNIPAAm fiber contact angle; \*\* $p < 0.05$  between dry and wetted fibers.

**FIGURE S4**

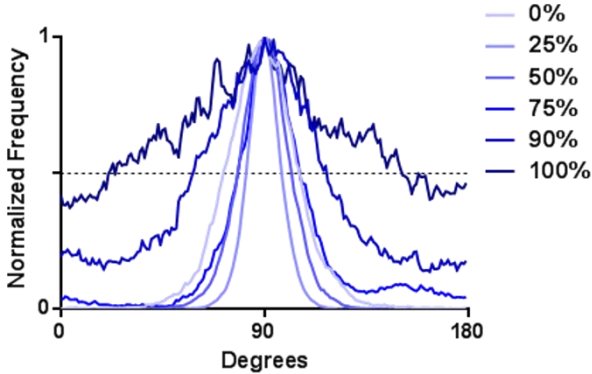

**Figure S4.** Representative histograms of cell angles as measured from actin of cells seeded on PNIPAAm/PCL fibers. Histograms were normalized to the peak frequency. Dashed line indicates half max.
